# Supplementary material for: Dichotomous outcomes of TNFR1 and TNFR2 signaling in NK cell-mediated immune responses during inflammation
Source: Springer Nature journal article supplement (doi:10.1038/s41467-024-54232-y), 2024-11-14
Supplement: MOESM1 [file 41467_2024_54232_MOESM1_ESM.pdf]

## **Supplementary Information**

### **Dichotomous outcomes of TNFR1 and TNFR2 signaling in NK cell-mediated immune responses during inflammation**

Timothy R. McCulloch<sup>#\*</sup>, Gustavo R. Rossi<sup>#</sup>, Louisa Alim<sup>#</sup>, Pui Yeng Lam, Joshua Wong, Elaina Coleborn, Snehlata Kumari, Colm Keane, Andrew J. Kueh, Marco J. Herold, Christoph Wilhelm, Percy A. Knolle, Lawrence Kane, Timothy J. Wells, and Fernando Souza-Fonseca-Guimaraes<sup>\*</sup>

<sup>#</sup> These authors contributed equally

<sup>\*</sup> Correspondence: Fernando Souza-Fonseca-Guimaraes and Timothy R. McCulloch

E-mails: [f.guimaraes@uq.edu.au](mailto:f.guimaraes@uq.edu.au) and [timothym@uni-bonn.de](mailto:timothym@uni-bonn.de)

Address: 37 Kent St, Woolloongabba, QLD 4102, Australia

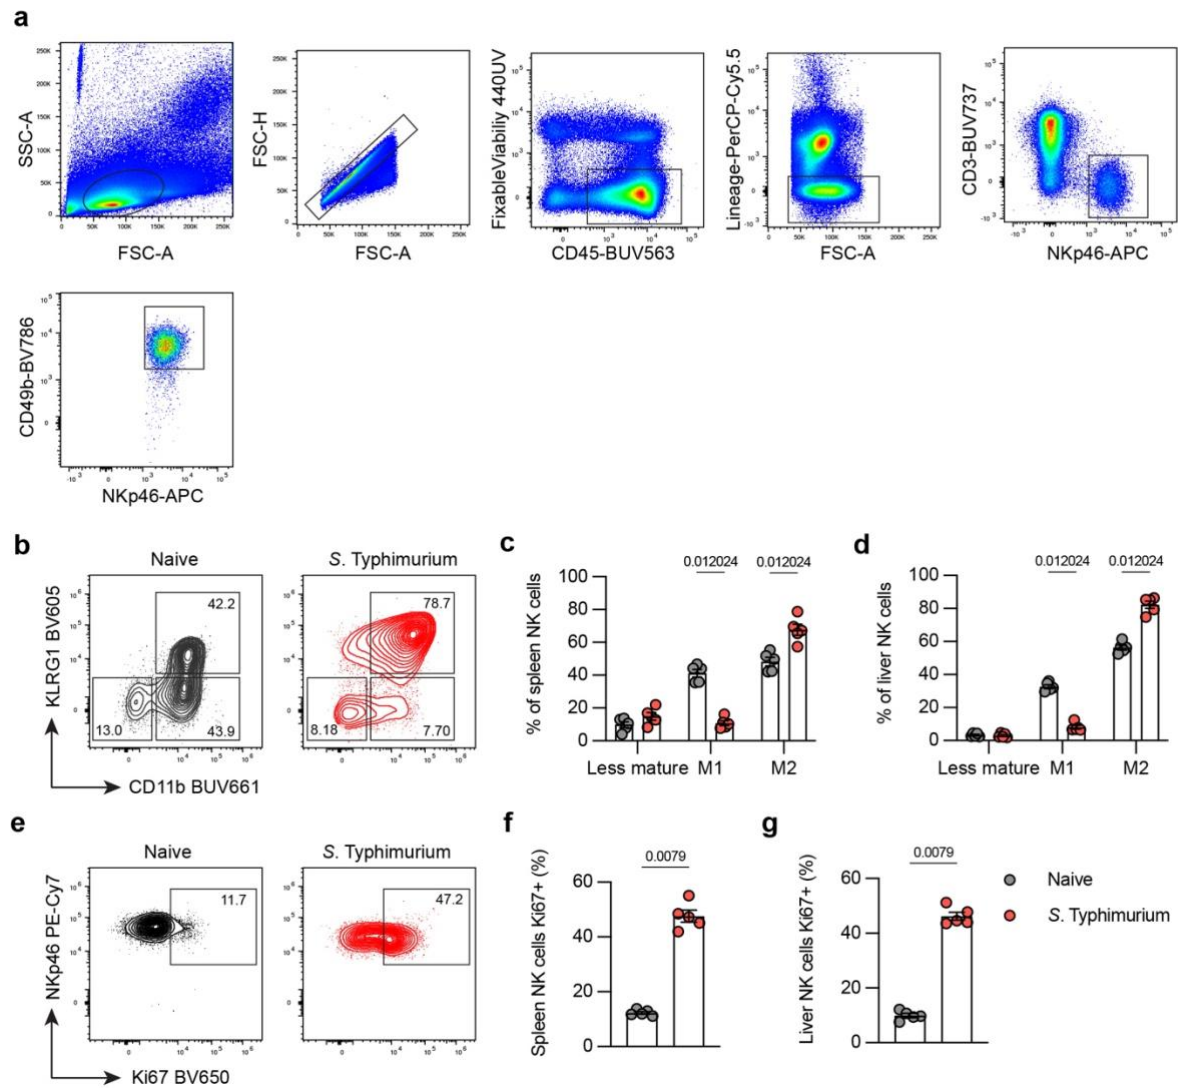

**Supplementary Fig. 1: Characterizing NK cells during *S. Typhimurium* infection.** Wild-type C57BL/6 mice were infected with attenuated *S. Typhimurium* (SL3261) and NK cells analyzed in the spleens and livers at day four post infection. **a**, Representative gating strategy used throughout the paper to examine NK cells by flow cytometry. **b**, Representative flow cytometry plots showing spleen NK cell maturation, where “less mature” are defined as CD11b<sup>-</sup>KLRG1<sup>-</sup>, M1 defined as CD11b<sup>+</sup>KLRG1<sup>-</sup>, and M2 defined as CD11b<sup>+</sup>KLRG1<sup>+</sup>. **c,d**, Relative proportions of each NK cell maturation state in the spleen (**c**) or liver (**d**). **e**, Representative flow cytometry plots showing proliferation by Ki67 expression in spleen NK cells. **f,g**, Relative proportions of NK cells expressing Ki67 the spleen (**c**) or liver (**d**). Data in **b-g** from a single experiment ( $n = 5$  biological replicates). Error bars indicate mean  $\pm$  SEM. Groups were compared using two-tailed Mann-Whitney U test, where  $P < 0.05$  was considered statistically significant. Source data are provided as a Source Data file.

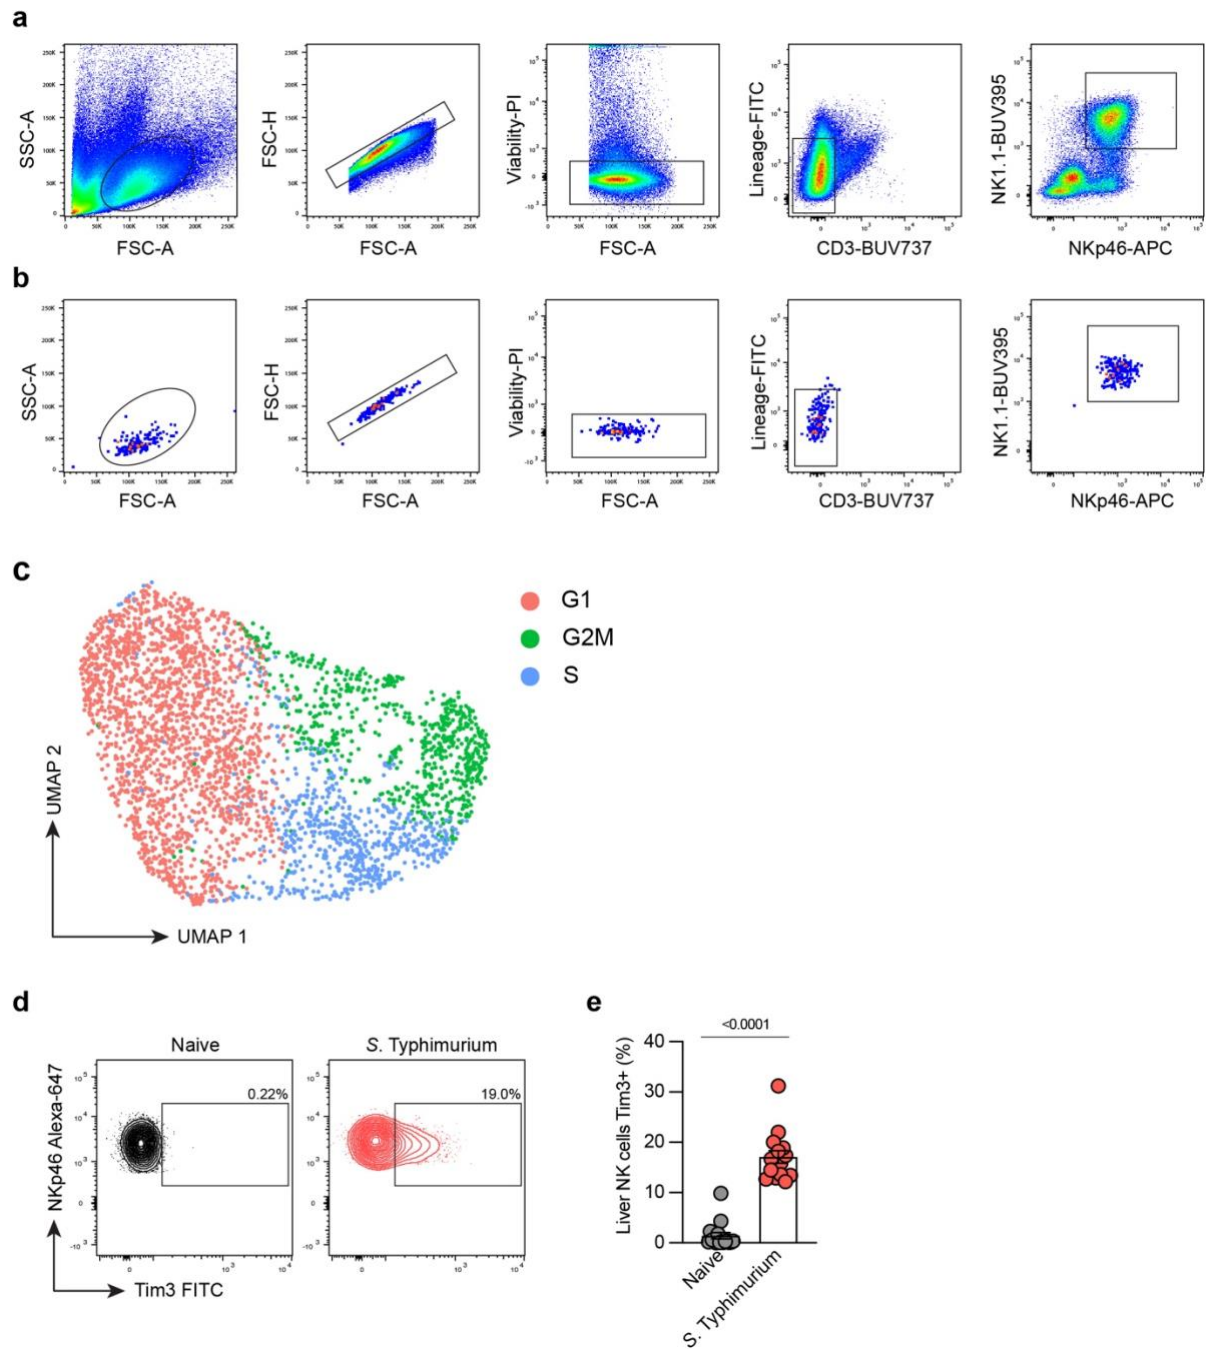

**Supplementary Fig. 2: Tim3 is upregulated on NK cells during *S. Typhimurium* infection.** Wild-type C57BL/6 mice were infected with attenuated *S. Typhimurium* (SL3261) and NK cells pre-enriched and sorted from the spleens at day four post infection. **a**, Gating strategy to sort pre-enriched NK cells. **b**, Representative post-sort purity of NK cells for scRNA-seq. **c**, Cell Cycle Scoring of NK cells from scRNA-seq. Wild-type C57BL/6 mice were infected with attenuated *S. Typhimurium* (SL3261) and NK analyzed at day four post infection. **d**, Representative flow plots showing expression of Tim3 on liver NK cells. **e**, Percentage of NK cells expressing Tim3 in the liver of naïve or *S. Typhimurium* infected mice. Data in **a-c** from a single experiment ( $n = 4$  biological replicates) and **d,e** pooled from two independent experiments ( $n = 15$  naïve mice and 14 *S. Typhimurium* infected). Error bars indicate mean  $\pm$  SEM. Groups were compared using two-tailed Mann-Whitney U test, where  $P < 0.05$  was considered statistically significant. Source data are provided as a Source Data file.

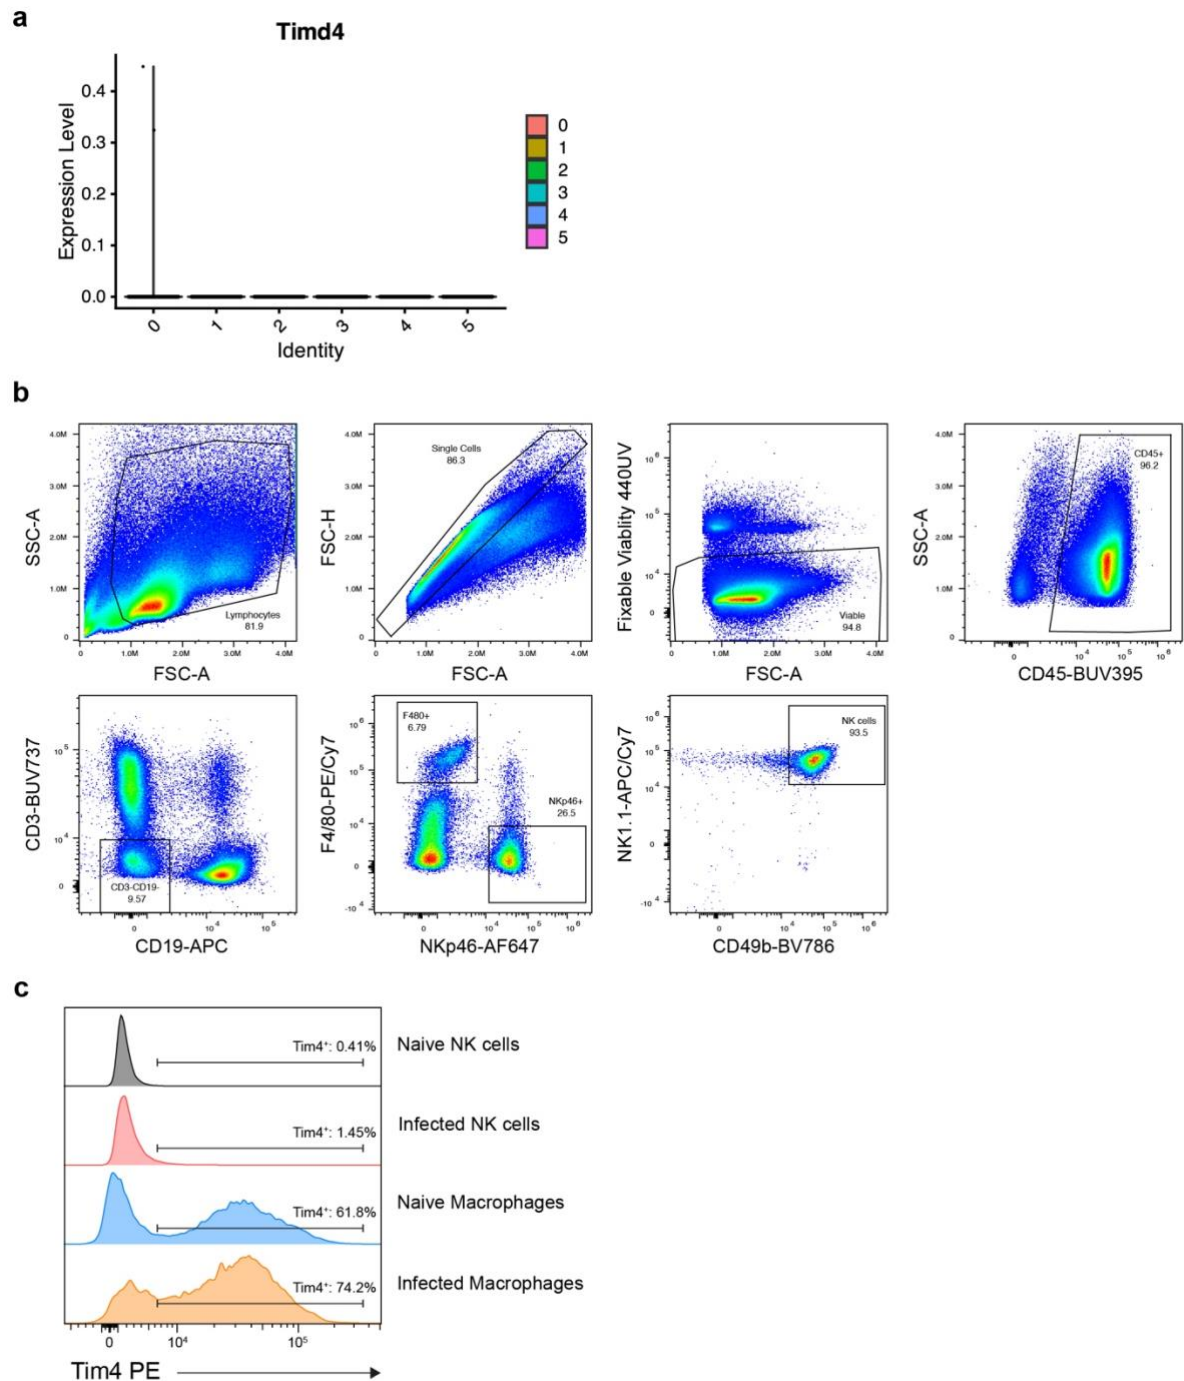

**Supplementary Figure 3: Tim4 is not expressed in NK cell populations.** Wild-type C57BL/6 mice were infected with *S. Typhimurium* and NK cells analyzed by scRNA-seq on day four post-infection. **a**, Expression of *Timd4* (encoding Tim4) across NK cell clusters. NK cells and F4/80<sup>+</sup> cells (assumed to be macrophages) from C57BL/6 spleens were analyzed by flow cytometry at day four post infection. **b**, Representative gating strategy to examine NK cells and F4/80<sup>+</sup> macrophages. **c**, Expression of Tim4 in indicated cell types. Data from a single experiment, representative of 5 biological replicates.

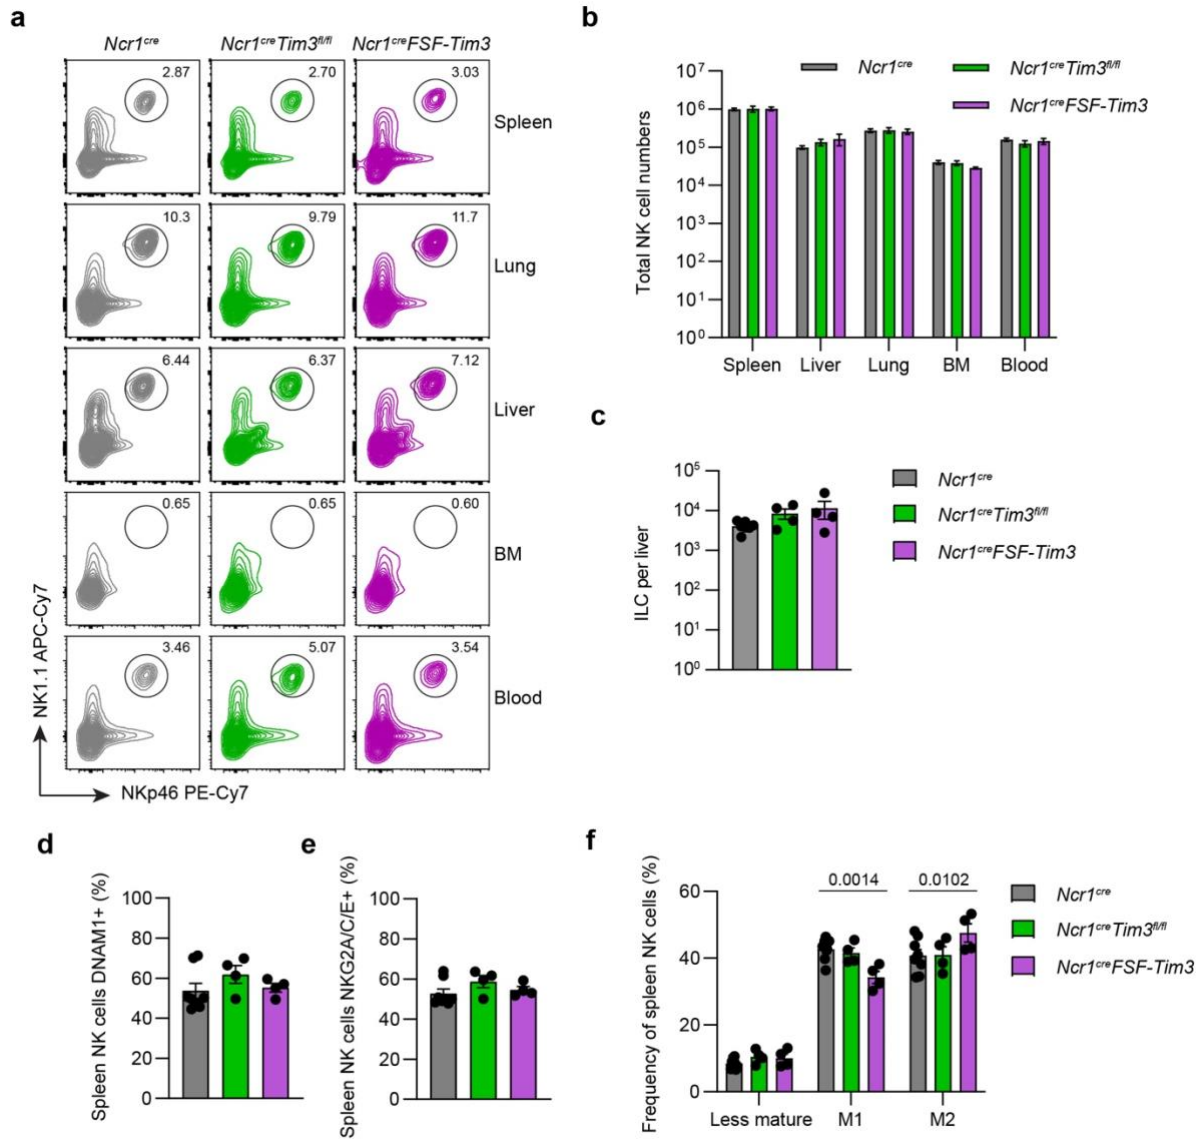

**Supplementary Fig. 4: Development of NK cells is largely normal in transgenic Tim3 mice.** Various organs were taken from naïve *Ncr1<sup>cre</sup>* (wild-type), *Ncr1<sup>cre</sup>Tim3<sup>fl/fl</sup>* (Tim3-null), or *Ncr1<sup>cre</sup>FSF-Tim3* (Tim3-overexpression) to analyze NK cell populations. **a**, Representative flow cytometry plots showing frequency of NK cells in the indicated organ. **b**, Quantification of total NK cell numbers per organ (blood represented as NK cells/ml). **c**, Quantification of total ILC1 numbers in the liver. **d-e**, Expression of NK maturation markers DNAM1 and NKG2A/C/E. **f**, Maturation of spleen NK cells determined by CD11b and KLRG1 staining (Less mature = CD11b<sup>+</sup>KLRG1<sup>-</sup>, M1 = CD11b<sup>+</sup>KLRG1<sup>+</sup>, M2 = CD11b<sup>+</sup>KLRG1<sup>+</sup>). Data are from a single experiment ( $n = 8$  *Ncr1<sup>cre</sup>*, 4 *Ncr1<sup>cre</sup>Tim3<sup>fl/fl</sup>*, and 4 *Ncr1<sup>cre</sup>FSF-Tim3*). Each dot represents one animal, error bars indicate mean  $\pm$  SEM. Groups were compared using 2-way ANOVA with Dunnett's multiple comparisons test for **b** and **f**, or Kruskal-Wallis test with Dunn's multiple comparisons test for **c-e**, where  $P < 0.05$  was considered statistically significant. Abbreviations: BM, bone marrow; ILC, innate lymphoid cell. Source data are provided as a Source Data file.



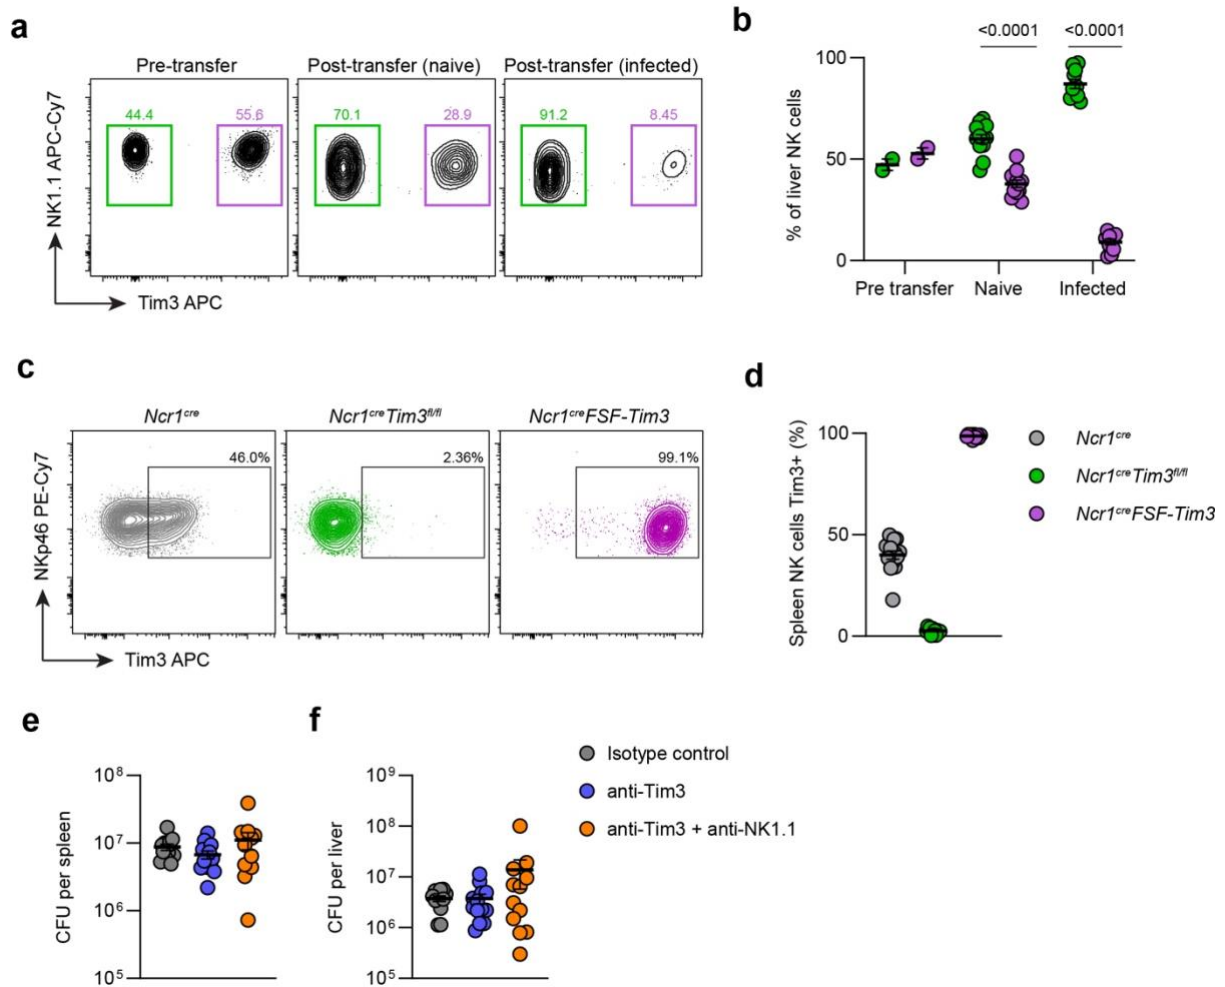

**Supplementary Fig. 5: Overexpression of Tim3 restricts NK cell accumulation and function.** NK cells isolated from Tim3-null or Tim3-overexpressing mice were adoptively transferred into *Rag2<sup>-/-</sup>γc<sup>-/-</sup>* mice and recipient mice infected or left naïve. **a**, Representative flow cytometry plots showing proportions of Tim3-null and Tim3-overexpressing NK cells pre-transfer and in adoptively transferred mice with or without infection. **b**, Relative proportions of NK cells pre-transfer and in livers of adoptively transferred mice with or without infection. *Ncr1<sup>cre</sup>*, *Ncr1<sup>cre</sup>Tim3<sup>fl/fl</sup>*, and *Ncr1<sup>cre</sup>FSF-Tim3* mice were infected with *S. Typhimurium* and spleens and livers analyzed at day four post infection. **c**, Representative flow cytometry plots showing expression of Tim3 on splenic NK cells. **d**, Expression of Tim3 on splenic NK cells. C57BL/6 mice were infected with *S. Typhimurium* and treated with anti-Tim3 blocking antibodies with or without NK cell depletion. **e,f**, Bacterial burdens in the spleen (**e**) and liver (**f**) of treated mice. Data are from two independent experiments (**a,b**:  $n = 12$  naïve mice and 9 *S. Typhimurium* infected; **c-d**:  $n = 15$  *Ncr1<sup>cre</sup>*, 12 *Ncr1<sup>cre</sup>Tim3<sup>fl/fl</sup>*, and 9 *Ncr1<sup>cre</sup>FSF-Tim3*; **e,f**:  $n = 12$  isotype control treated mice, 13 anti-Tim3 treated mice, and 12 anti-Tim3 + anti-NK1.1 treated mice). Each dot represents one animal, error bars indicate mean  $\pm$  SEM. Groups were compared using two-tailed Mann-Whitney U test for **b**, or Kruskal-Wallis test with Dunn's multiple comparisons test for **e,f**, where  $P < 0.05$  was considered statistically significant. Abbreviations: CFU, colony forming units. Source data are provided as a Source Data file.

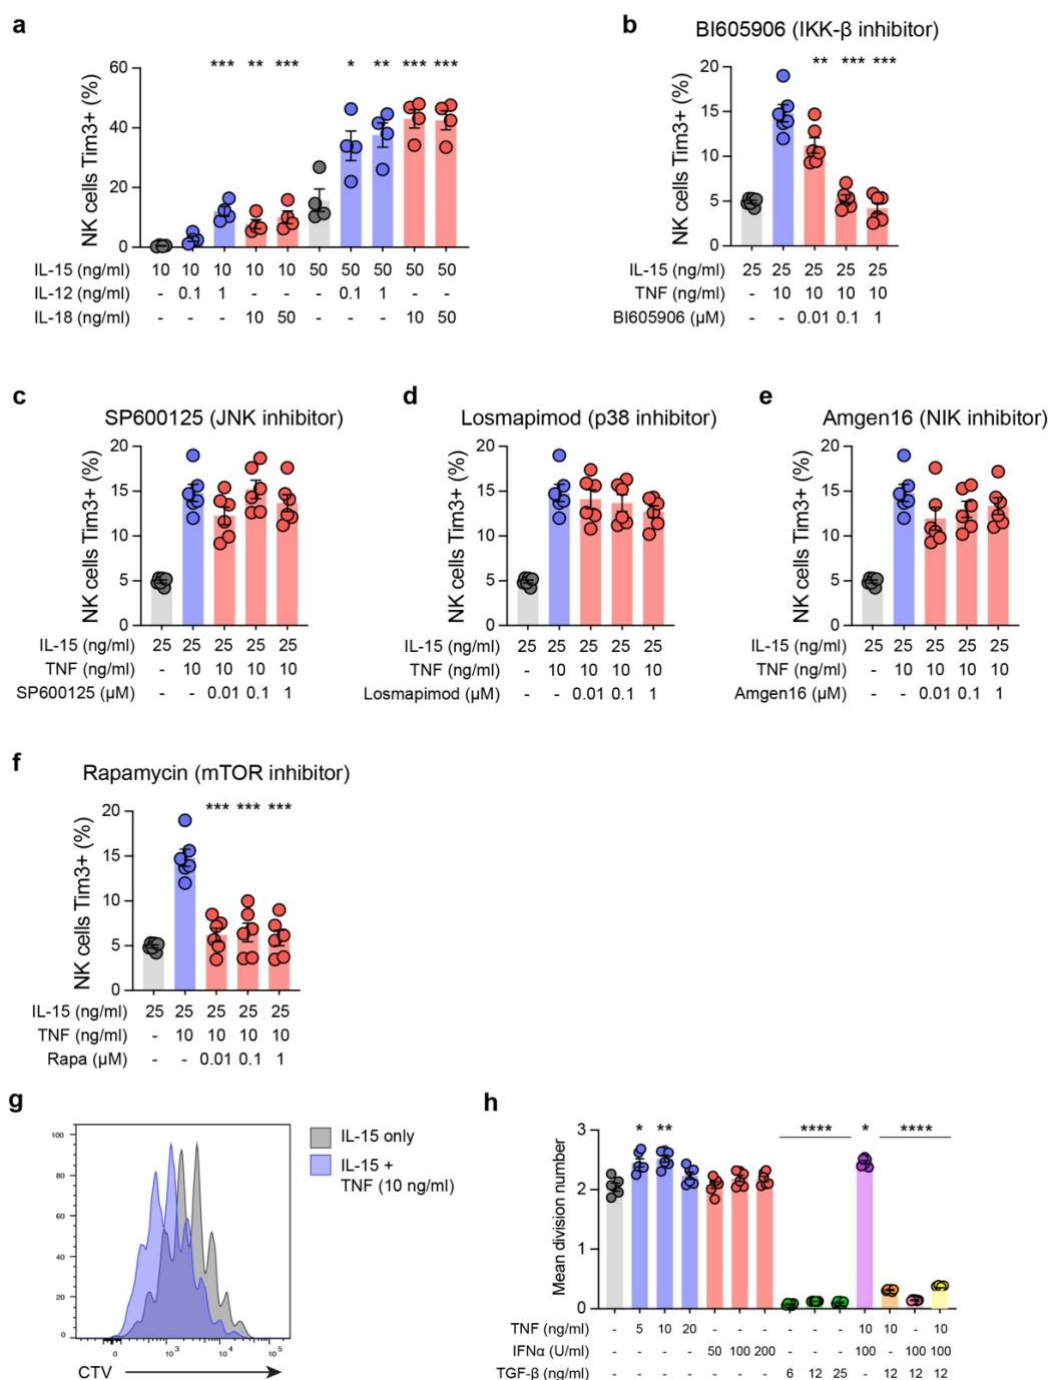

**Supplementary Fig. 6: Upregulation of Tim3 in NK cells.** NK cells from wild-type C57BL/6 mice were isolated and cultured for three days in the presence of the indicated cytokines and/or inhibitors. **a**, Expression of Tim3 on NK cells in response to IL-12 or IL-18 signaling. **b**, Effects of IKK- $\beta$  inhibitor BI605906 on TNF-induced Tim3 expression. **c**, Effects of JNK inhibitor SP600125 on TNF-induced Tim3 expression. **d**, Effects of p38 inhibitor Losmapimod on TNF-induced Tim3 expression. **e**, Effects of NIK inhibitor Amgen16 on TNF-induced Tim3 expression. **f**, Effects of mTOR inhibitor rapamycin on TNF-induced Tim3 expression. **g**, Representative flow cytometry plots showing CTV dye dilution. **h**, Mean division number, calculated as described by Hawkins *et al*<sup>28</sup>. Data are from two independent experiments ( $n = 6$  biological replicates). Each dot represents one animal, error bars indicate mean  $\pm$  SEM. In **a** and **h** groups were compared to IL-15 only, and in **b-f** groups were compared to IL-15 + TNF using one-way ANOVA with Dunnett's multiple comparisons test (\* $P < 0.05$ , \*\* $P < 0.01$ , \*\*\* $P < 0.001$ ), where  $P < 0.05$  was considered statistically significant. Abbreviations: TNF, tumor necrosis factor; IFN, interferon; TGF, tumor growth factor. Source data are provided as a Source Data file.

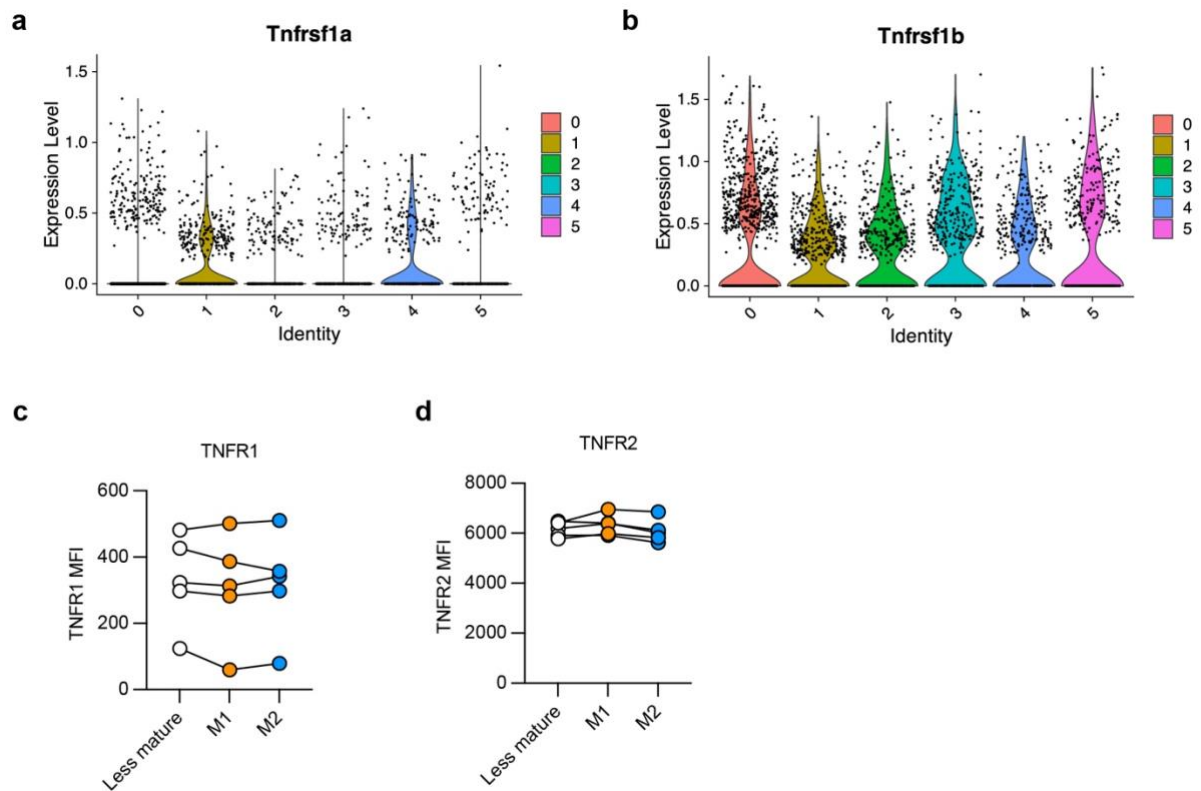

**Supplementary Fig. 7: TNFR expression across NK cell populations.** Wild-type mice were infected with *S. Typhimurium* and NK cells analyzed by scRNA-seq on day four post-infection. **a**, Expression of *Tnfrsf1a*, encoding TNFR1, across NK cell clusters. **b**, Expression of *Tnfrsf1b*, encoding TNFR2, across NK cell clusters. Splenic NK cells from naïve mice were analyzed by flow cytometry. **c**, MFI of TNFR1 across NK cell populations. **d**, MFI of TNFR2 across NK cell populations (less mature: CD11b<sup>-</sup>KLRG1<sup>-</sup>; M1: CD11b<sup>+</sup>KLRG1<sup>-</sup>; M2: CD11b<sup>+</sup>KLRG1<sup>+</sup>). Source data are provided as a Source Data file. Data from a single experiment ( $n = 5$  biological replicates). Source data are provided as a Source Data file.



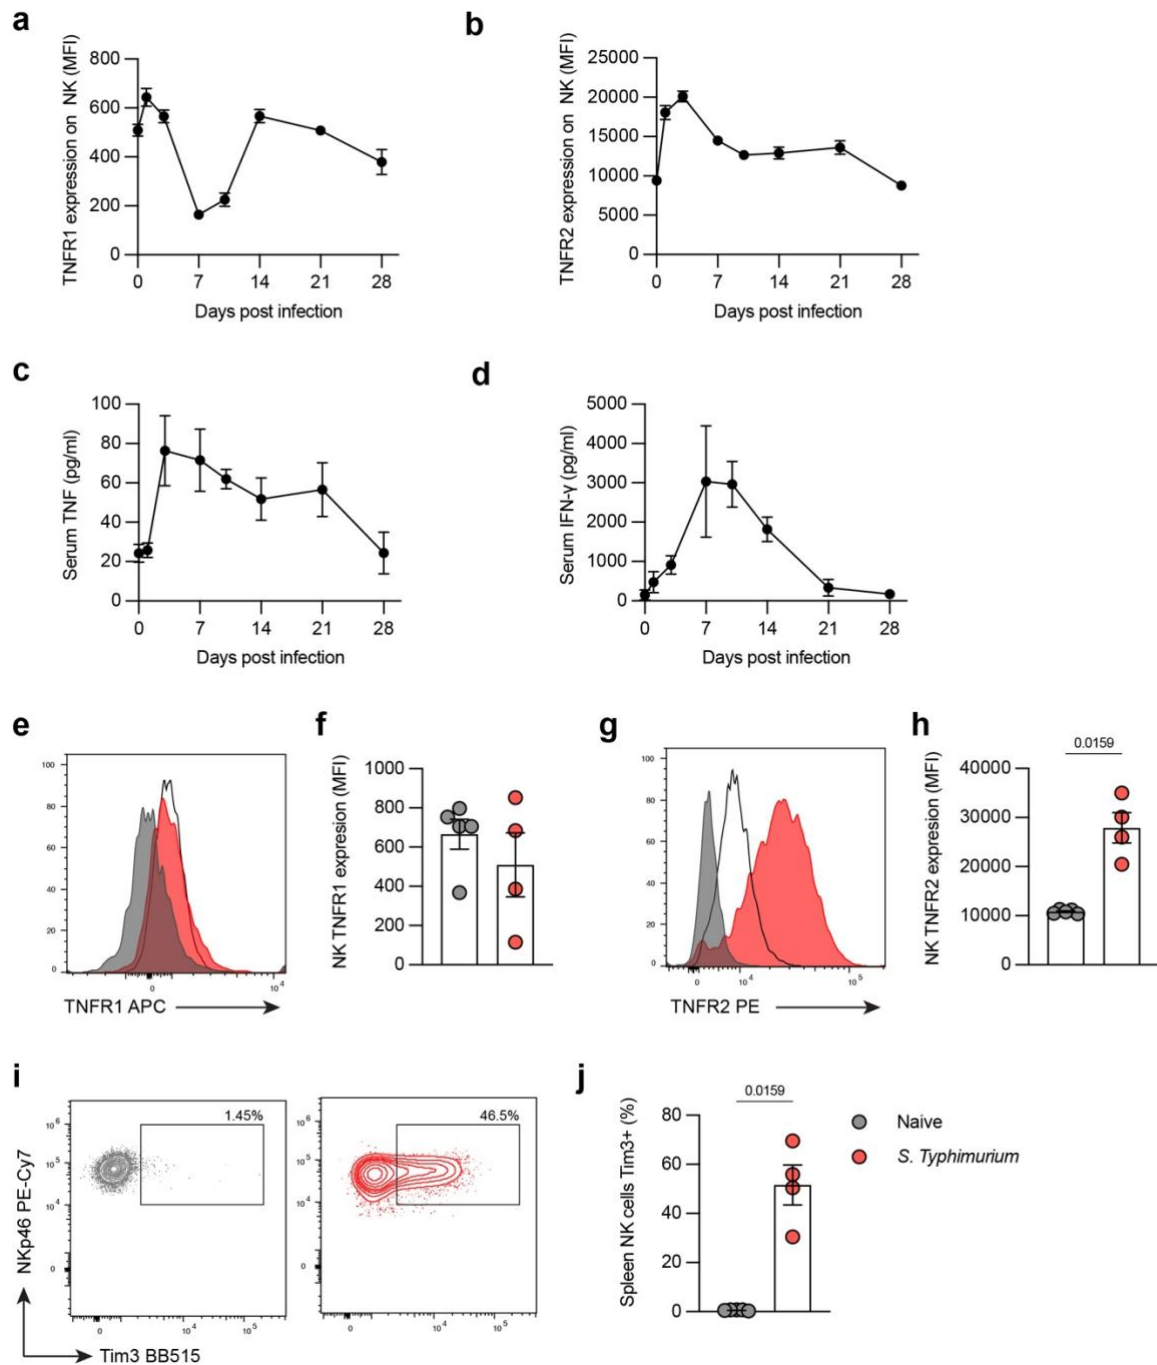

**Supplementary Fig. 8: Expression of TNFR1 and TNFR2 on NK cells during *S. Typhimurium* infection.**

Wild-type C57BL/6 mice were infected with attenuated *S. Typhimurium* (SL3261) and splenic NK cells analyzed by flow cytometry at different timepoints post-infection. **a**, Expression of TNFR1 on NK cells at different timepoints. **b**, Expression of TNFR2 on NK cells at different timepoints. **c**, Serum titers of IFN- $\gamma$  at different timepoints. **d**, Serum titers of TNF at different timepoints. Wild-type C57BL/6 mice were infected with wild-type *S. Typhimurium* (SL1344) by oral gavage and NK cells from all animals analyzed three days post onset of weight loss was observed in any mouse. **e-f**, Expression of TNFR1 on splenic NK cells. **g-h**, Expression of TNFR2 on splenic NK cells. **i-j**, Expression of Tim3 on splenic NK cells. Data from a single experiment (**a,b**:  $n = 4-5$  biological replicates per timepoint; **c,d**: 3-7 biological replicates per timepoint; **e-j**:  $n = 5$  naïve mice and 4 *S. Typhimurium* infected) Error bars indicate mean  $\pm$  SEM. Groups were compared using two-tailed Mann-Whitney U test, where  $P < 0.05$  was considered statistically significant. Source data are provided as a Source Data file.

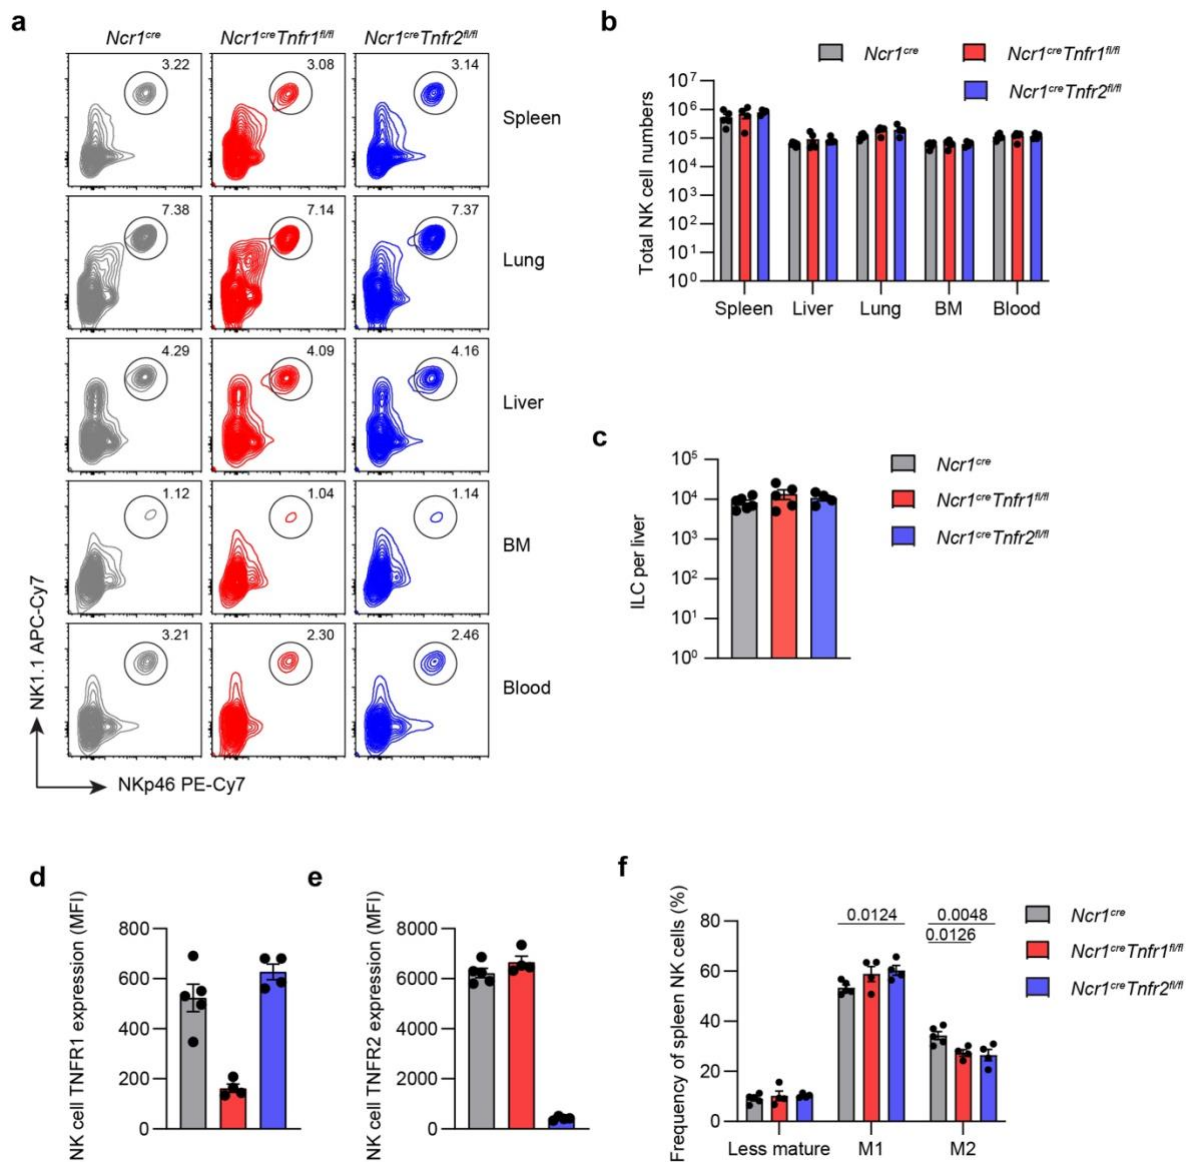

**Supplementary Fig. 9: Normal NK cell development during conditional deletion of TNFR1 or 2 in NK cells.** Various organs were taken from naïve *Ncr1<sup>cre</sup>*, *Ncr1<sup>cre</sup>Tnfr1<sup>fl/fl</sup>*, or *Ncr1<sup>cre</sup>Tnfr2<sup>fl/fl</sup>* to analyze NK cell populations. **a**, Representative flow cytometry plots showing frequency of NK cells in the indicated organ. **b**, Quantification of total NK cell numbers per organ (blood represented as NK cells/ml). **c**, **b**, Quantification of total ILC1 numbers per liver. **d,e**, Expression of TNFR1 (**d**) or TNFR2 (**e**) in splenic NK cells **f**, Maturation of spleen and NK cells determined by CD11b and KLRG1 staining (Less mature = CD11b<sup>+</sup>KLRG1<sup>-</sup>, M1 = CD11b<sup>+</sup>KLRG1<sup>+</sup>, M2 = CD11b<sup>+</sup>KLRG1<sup>+</sup>). Data are from a single experiment ( $n = 5$  *Ncr1<sup>cre</sup>*, 4 *Ncr1<sup>cre</sup>Tnfr1<sup>fl/fl</sup>*, and 4 *Ncr1<sup>cre</sup>Tnfr2<sup>fl/fl</sup>*). Each dot represents one animal, error bars indicate mean  $\pm$  SEM. Groups were compared using Kruskal-Wallis test with Dunn's multiple comparisons test, where  $P < 0.05$  was considered statistically significant. Abbreviations: BM, bone marrow; ILC, innate lymphoid cell. Source data are provided as a Source Data file.

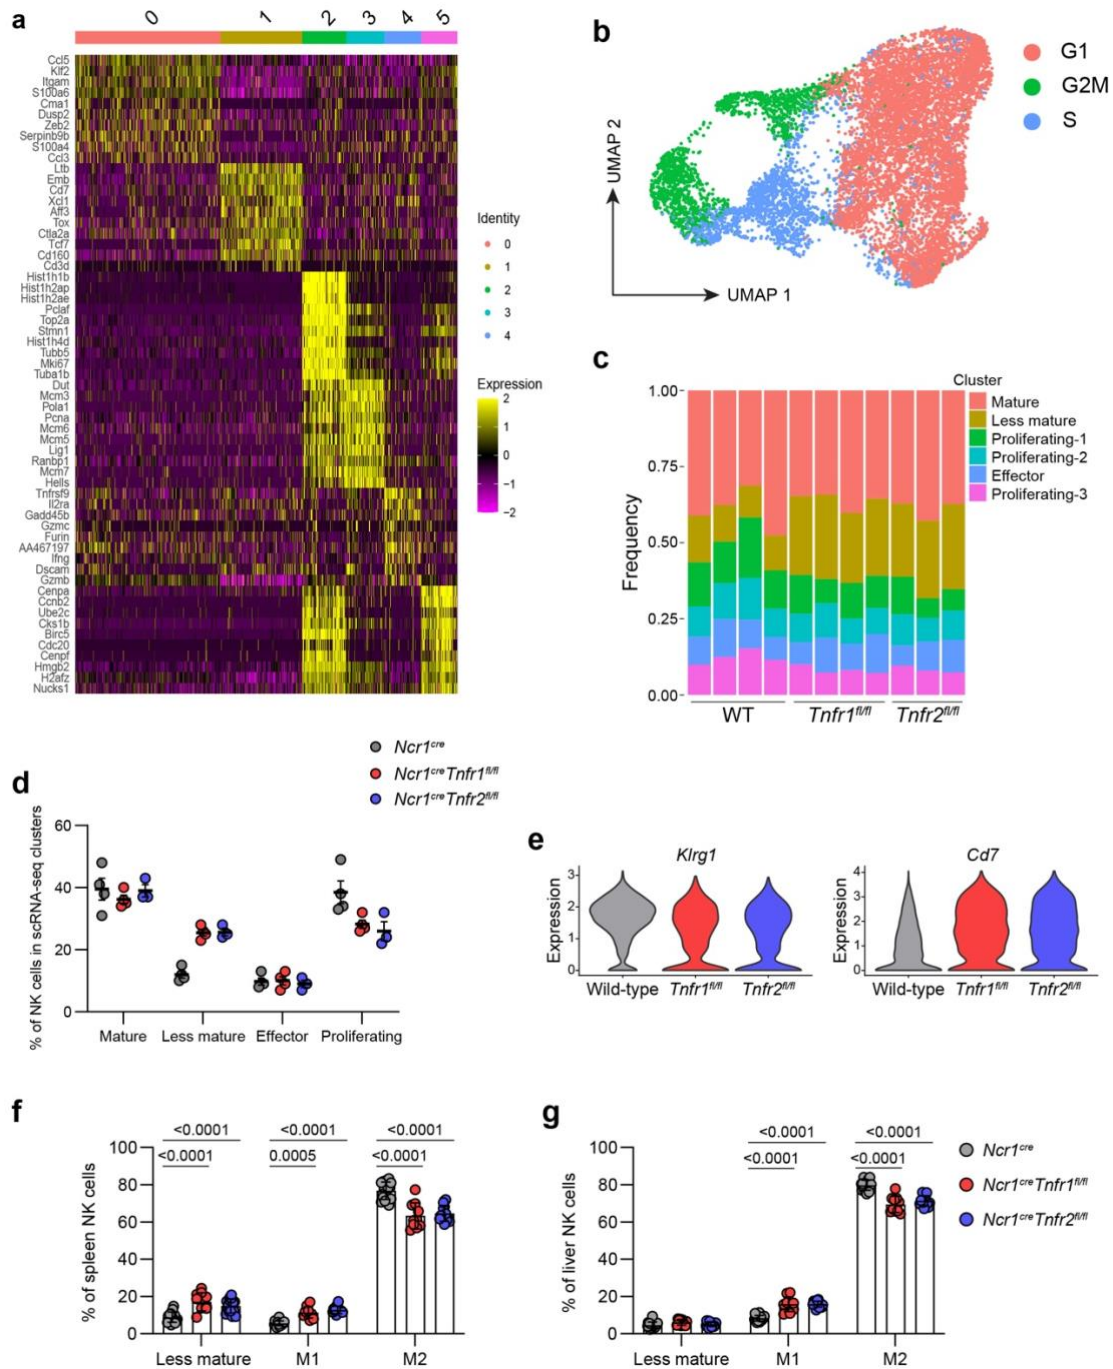

**Supplementary Fig. 10: scRNA-seq of NK cells from transgenic TNF receptor mice.** *Ncr1<sup>cre</sup>*, *Ncr1<sup>cre</sup>Tnfr1<sup>fl/fl</sup>*, or *Ncr1<sup>cre</sup>Tnfr2<sup>fl/fl</sup>* were infected with *S. Typhimurium* and NK cells pre-enriched and sorted at day four post-infection for scRNA-seq. **a**, Heatmap showing top 10 signature genes identifying each Seurat cluster. **b**, Cell cycle prediction. **c**, Relative frequency of NK cells in each Seurat cluster, where each column represents a biological replicate. **d**, Percentage of NK cells in each Seurat cluster (proliferating 1, 2, and 3 combined). **e**, Violin plots showing relative expression of *Klrp1* or *Cd7*. **f**, Percentage of splenic NK cells in each maturation stage based on CD11b and KLRG1 expression (Imm = CD11b<sup>-</sup>KLRG1<sup>-</sup>, M1 = CD11b<sup>+</sup>KLRG1<sup>-</sup>, M2 = CD11b<sup>+</sup>KLRG1<sup>+</sup>). Data from **a-e** from a single experiment ( $n = 4$  *Ncr1<sup>cre</sup>*, 4 *Ncr1<sup>cre</sup>Tnfr1<sup>fl/fl</sup>*, and 3 *Ncr1<sup>cre</sup>Tnfr2<sup>fl/fl</sup>*), and data from **f-g** pooled from two independent experiments ( $n = 17$  *Ncr1<sup>cre</sup>*, 10 *Ncr1<sup>cre</sup>Tnfr1<sup>fl/fl</sup>*, and 15 *Ncr1<sup>cre</sup>Tnfr2<sup>fl/fl</sup>*). Each dot represents one animal, error bars indicate mean  $\pm$  SEM. Groups were compared using Kruskal-Wallis test with Dunn's multiple comparisons test, where  $P < 0.05$  was considered statistically significant. Source data are provided as a Source Data file.

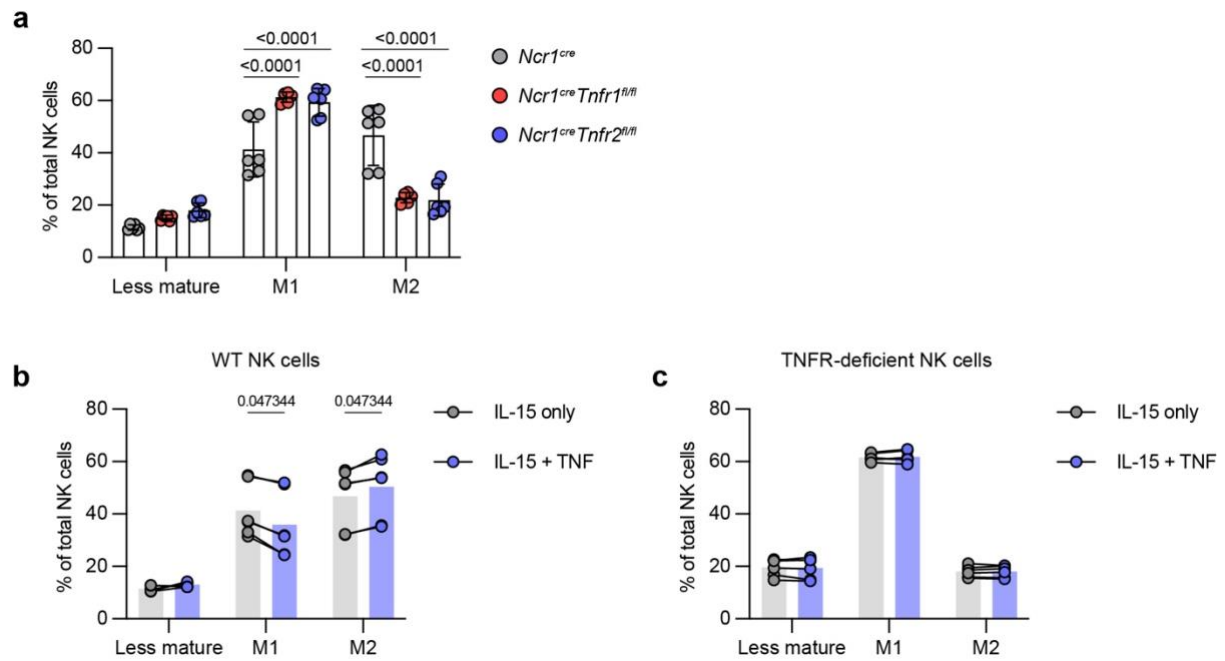

**Supplementary Fig. 11: Maturation of TNFR-deficient NK cells.** NK cells isolated from indicated genotypes were cultured in the presence of 25 ng/ml IL-15 +/- 10 ng/ml TNF for 3 days, then CD11b and KLRG1 expression measured to determine maturation status (less mature: CD11b<sup>-</sup>KLRG1<sup>-</sup>; M1: CD11b<sup>+</sup>KLRG1<sup>-</sup>; M2: CD11b<sup>+</sup>KLRG1<sup>+</sup>). **a**, Maturation status of each genotype treated with 25 ng/ml IL-15 only. **b**, Maturation status of NK cells from WT mice in response to IL-15 +/- TNF. **c**, Maturation status of NK cells from TNFR1/TNFR2-floxed mice in response to IL-15 +/- TNF. Data are from two independent experiments ( $n = 6$  biological replicates). Each dot represents one animal, error bars indicate mean  $\pm$  SEM. Groups were compared using Kruskal-Wallis test with Dunn's multiple comparisons test for **a**, or Wilcoxon matched-pairs rank test for **b-c**, where  $P < 0.05$  was considered statistically significant. Source data are provided as a Source Data file.

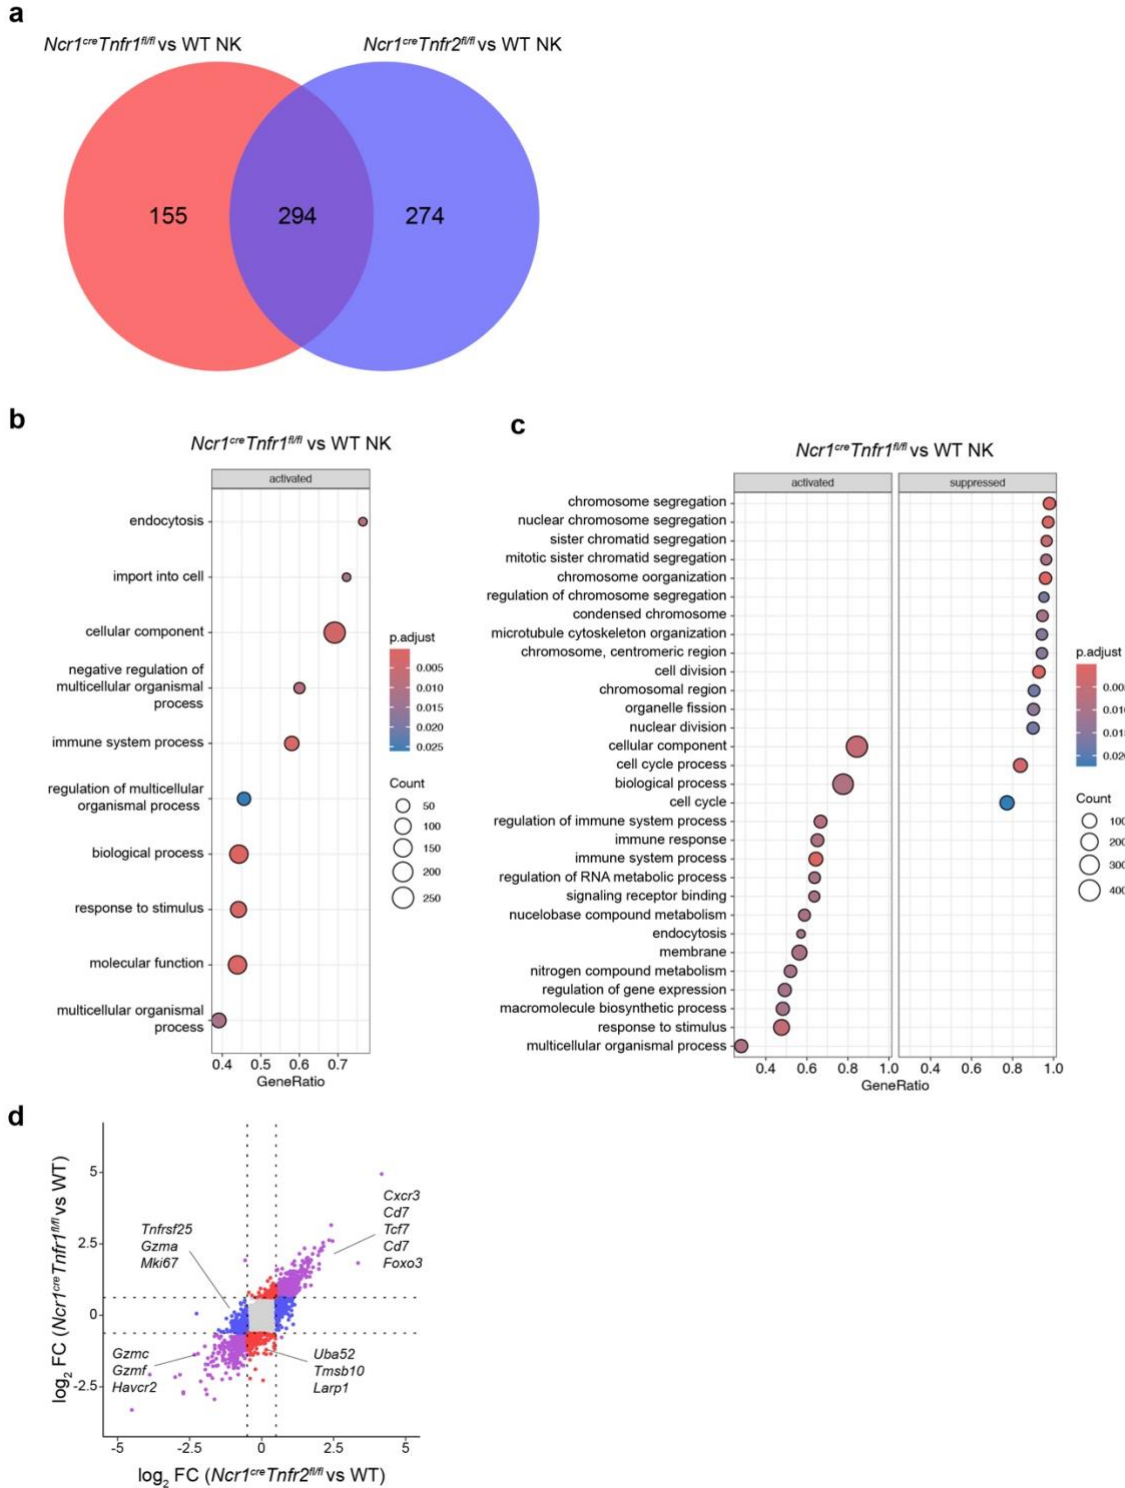

**Supplementary Fig. 12: Comparison of differentially expressed genes between *Ncr1<sup>cre</sup>Tnfr1<sup>fl/fl</sup>* and WT or *Ncr1<sup>cre</sup>Tnfr2<sup>fl/fl</sup>* and WT. **a**, Venn diagram comparing number of differentially expressed genes between WT and *Ncr1<sup>cre</sup>Tnfr1<sup>fl/fl</sup>* or WT and *Ncr1<sup>cre</sup>Tnfr2<sup>fl/fl</sup>*, or shared between each analysis. **b,c**, GSEA analysis of DEGs between WT and *Ncr1<sup>cre</sup>Tnfr1<sup>fl/fl</sup>* (**b**) or WT and *Ncr1<sup>cre</sup>Tnfr2<sup>fl/fl</sup>* (**c**) by gseG. **d**, Comparison of log<sub>2</sub>FC differentially expressed genes between WT and *Ncr1<sup>cre</sup>Tnfr1<sup>fl/fl</sup>*, and WT and *Ncr1<sup>cre</sup>Tnfr2<sup>fl/fl</sup>*. Dotted lines represent log<sub>2</sub>FC cut-off of 0.5. Grey dots represent genes not differentially expressed, purple dots represent genes differentially expressed in both genotypes, red dots represent genes differentially expressed only in *Ncr1<sup>cre</sup>Tnfr1<sup>fl/fl</sup>* NK cells, and blue dots represent genes differentially expressed only in *Ncr1<sup>cre</sup>Tnfr2<sup>fl/fl</sup>* NK cells.**



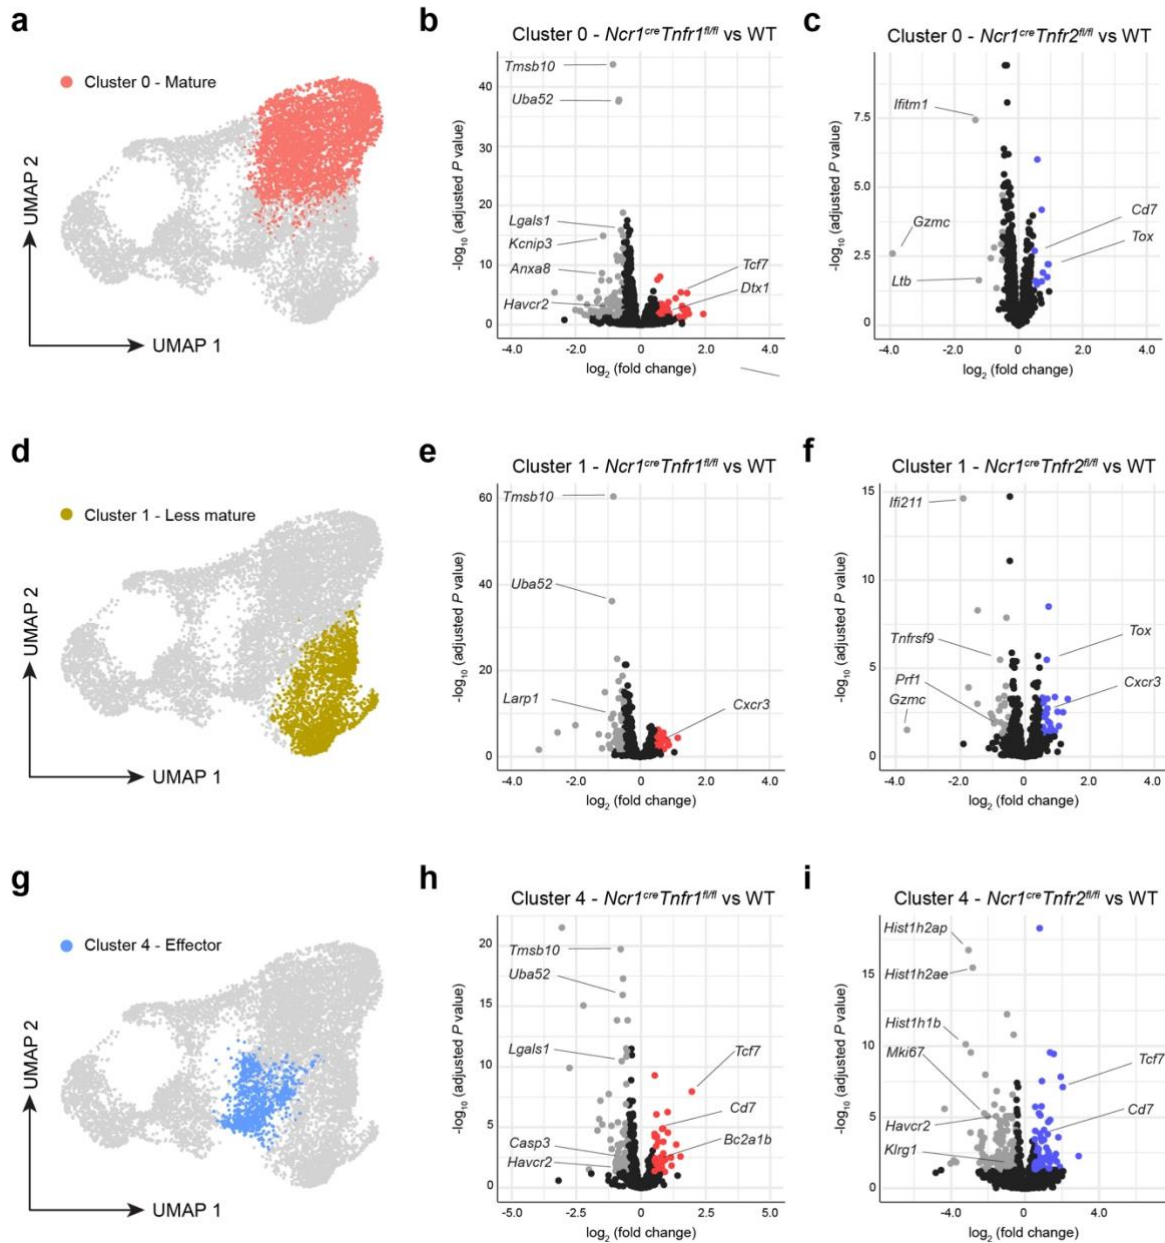

**Supplementary Fig. 13: Differential gene expression between *Ncr1<sup>cre</sup>Tnfr1<sup>fl/fl</sup>* and WT or *Ncr1<sup>cre</sup>Tnfr2<sup>fl/fl</sup>* and WT across non-proliferating clusters.** **a**, Representative UMAP highlighting the mature cluster. **b,c**, Volcano plots showing differentially expressed genes between WT and *Ncr1<sup>cre</sup>Tnfr1<sup>fl/fl</sup>* NK cells, or WT and *Ncr1<sup>cre</sup>Tnfr2<sup>fl/fl</sup>* NK cells from the mature NK cell cluster. **d**, Representative UMAP highlighting the less mature cluster. **e,f**, Volcano plots showing differentially expressed genes between WT and *Ncr1<sup>cre</sup>Tnfr1<sup>fl/fl</sup>* NK cells, or WT and *Ncr1<sup>cre</sup>Tnfr2<sup>fl/fl</sup>* NK cells from the less mature NK cell cluster. **g**, Representative UMAP highlighting the effector cluster. **h,i**, Volcano plots showing differentially expressed genes between WT and *Ncr1<sup>cre</sup>Tnfr1<sup>fl/fl</sup>* NK cells, or WT and *Ncr1<sup>cre</sup>Tnfr2<sup>fl/fl</sup>* NK cells from the effector NK cell cluster. For volcano plots, grey dots represent genes upregulated in WT cells, red dots represent genes upregulated in *Ncr1<sup>cre</sup>Tnfr1<sup>fl/fl</sup>* cells, and blue dots represent genes upregulated in *Ncr1<sup>cre</sup>Tnfr2<sup>fl/fl</sup>* cells ( $\log_2\text{FC} > 0.5$  and adjusted  $P < 0.05$ ). Data from a single experiment ( $n = 4$  *Ncr1<sup>cre</sup>*, 4 *Ncr1<sup>cre</sup>Tnfr1<sup>fl/fl</sup>*, and 3 *Ncr1<sup>cre</sup>Tnfr2<sup>fl/fl</sup>*). Groups were compared using Wald test with Benjamini and Hochberg adjustment, where  $P < 0.05$  was considered statistically significant.

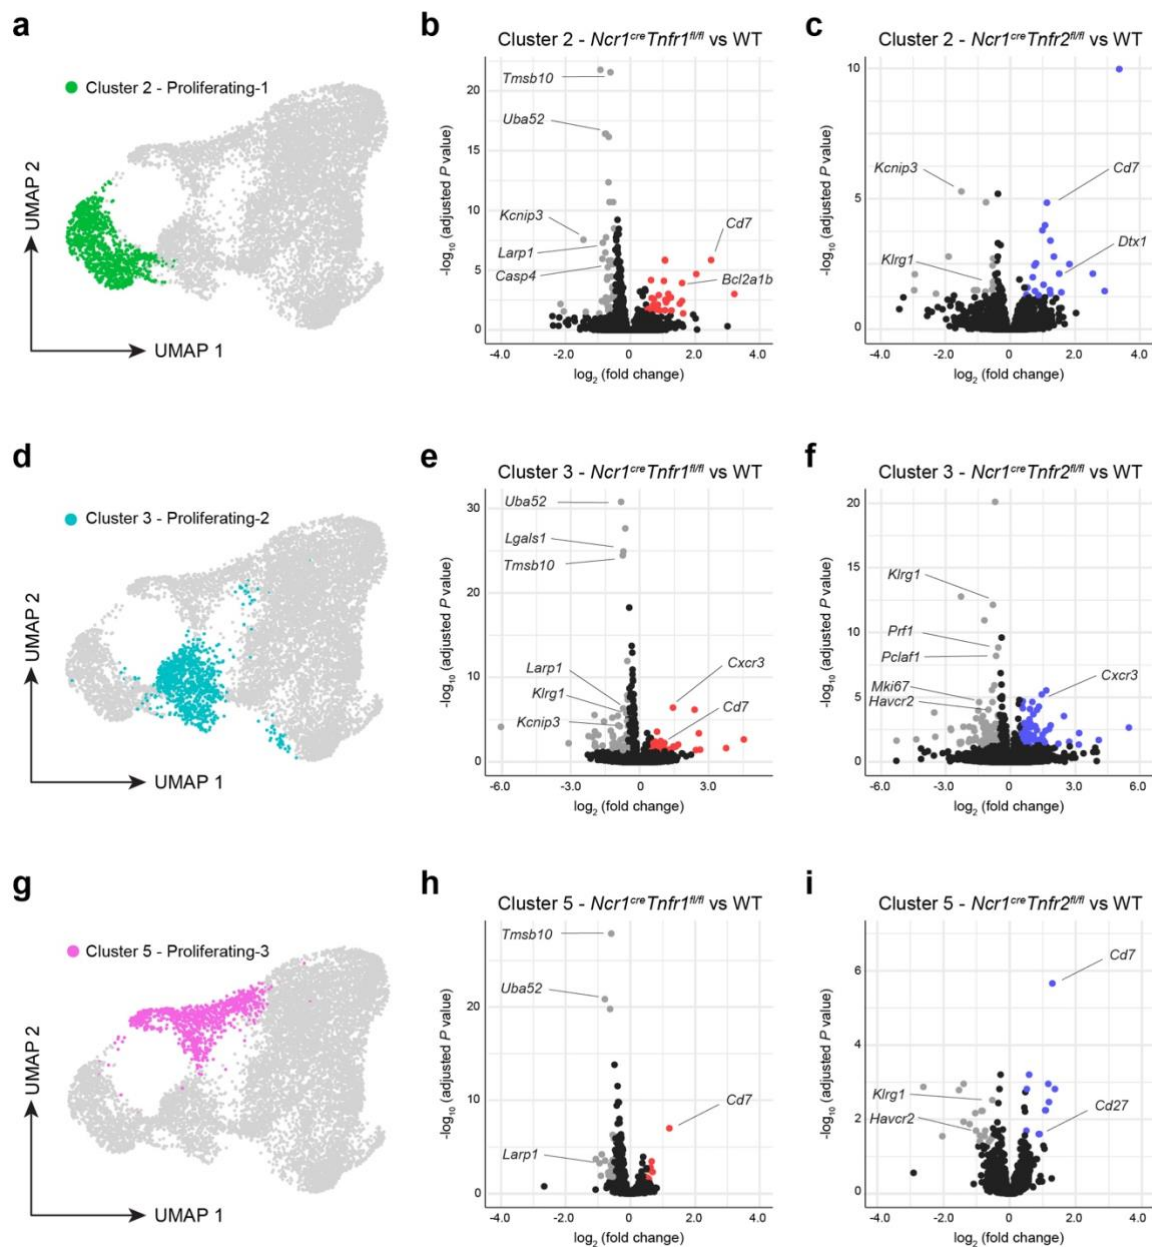

**Supplementary Fig. 14: Differential gene expression between *Ncr1<sup>cre</sup>Tnfr1<sup>fl/fl</sup>* and WT or *Ncr1<sup>cre</sup>Tnfr2<sup>fl/fl</sup>* and WT across proliferating clusters.** **a**, Representative UMAP highlighting the proliferating-1 cluster. **b,c**, Volcano plots showing differentially expressed genes between WT and *Ncr1<sup>cre</sup>Tnfr1<sup>fl/fl</sup>* NK cells, or WT and *Ncr1<sup>cre</sup>Tnfr2<sup>fl/fl</sup>* NK cells from the proliferating-1 NK cell cluster. **d**, Representative UMAP highlighting the proliferating-1 cluster. **e,f**, Volcano plots showing differentially expressed genes between WT and *Ncr1<sup>cre</sup>Tnfr1<sup>fl/fl</sup>* NK cells, or WT and *Ncr1<sup>cre</sup>Tnfr2<sup>fl/fl</sup>* NK cells from the proliferating-1 NK cell cluster. **g**, Representative UMAP highlighting the proliferating-1 cluster. **h,i**, Volcano plots showing differentially expressed genes between WT and *Ncr1<sup>cre</sup>Tnfr1<sup>fl/fl</sup>* NK cells, or WT and *Ncr1<sup>cre</sup>Tnfr2<sup>fl/fl</sup>* NK cells from the proliferating-1 NK cell cluster. For volcano plots, grey dots represent genes upregulated in WT cells, red dots represent genes upregulated in *Ncr1<sup>cre</sup>Tnfr1<sup>fl/fl</sup>* cells, and blue dots represent genes upregulated in *Ncr1<sup>cre</sup>Tnfr2<sup>fl/fl</sup>* cells ( $\log_2\text{FC} > 0.5$  and adjusted  $P < 0.05$ ). Data from a single experiment ( $n = 4$  *Ncr1<sup>cre</sup>*, 4 *Ncr1<sup>cre</sup>Tnfr1<sup>fl/fl</sup>*, and 3 *Ncr1<sup>cre</sup>Tnfr2<sup>fl/fl</sup>*). Groups were compared using Wald test with Benjamini and Hochberg adjustment, where  $P < 0.05$  was considered statistically significant.

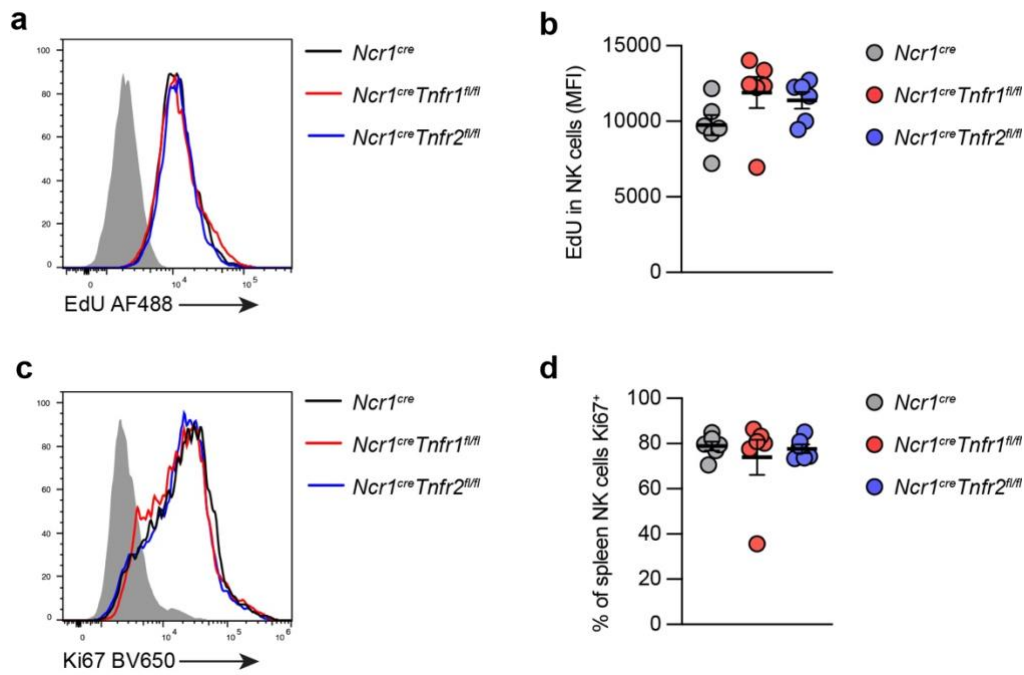

**Supplementary Fig. 15: EdU incorporation and Ki67 expression in TNFR1 and TNFR2 deficient NK cells.** Transgenic *Ncr1<sup>cre</sup>*, *Ncr1<sup>cre</sup>Tnfr1<sup>fl/fl</sup>*, and *Ncr1<sup>cre</sup>Tnfr2<sup>fl/fl</sup>* mice were infected with *S. Typhimurium* and spleens and analyzed at day four post infection by flow cytometry. **a**, Representative histograms of EdU incorporation in NK cells. **b**, Relative levels of EdU in NK cells. **c**, Representative histograms of Ki67 expression in NK cells. **d**, Relative levels of Ki67 expression in NK cells. Data from **a-b** are from a single experiment ( $n = 6$  biological replicates), data from **c-d** from a single experiment representative of two independent experiments ( $n = 6$  biological replicates). Each dot represents one animal, error bars indicate mean  $\pm$  SEM. Groups were compared using and Kruskal-Wallis test with Dunn's multiple comparisons test, where  $P < 0.05$  was considered statistically significant. Source data are provided as a Source Data file.

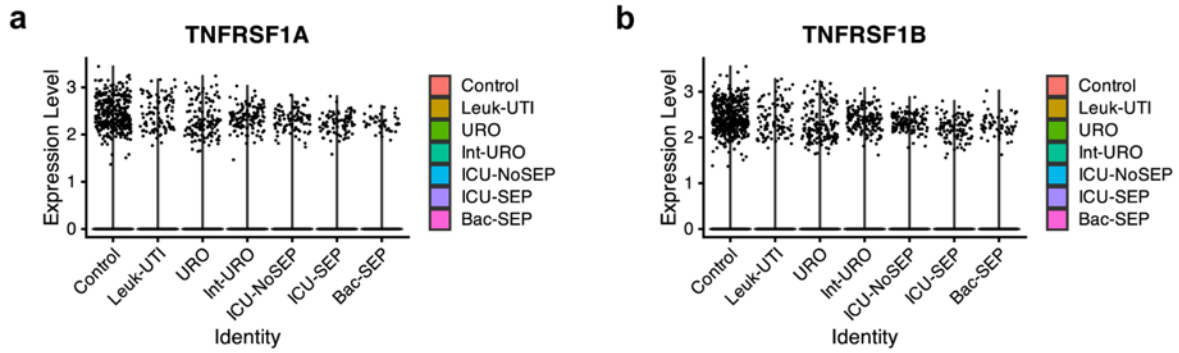

**Supplementary Fig. 16: TNFR expression is similar in NK cells across sepsis patients.** Reanalysis of scRNA-seq datasets of sepsis patients from Reyes et al, 2020. **a**, Expression of *TNFRSF1A* (encoding TNFR1) in NK cells across the cohorts. **b**, Expression of *TNFRSF1B* (encoding TNFR2) in NK cells across the cohorts. All data from published datasets ( $n = 19$  control, 10 Leuk-UTI, 7 Int-URO, 9 URO, 7 ICU-NoSEP, 8 ICU-SEP, and 4 Bac-SEP). Abbreviations: UTI, urinary tract infection; URO, urosepsis; ICU, intensive care unit; SEP, sepsis; Bac, bacterial.

**Supplementary Table 1: List of antibodies used in the study**

| <b>Antibody</b>            | <b>Clone</b> | <b>Supplier</b> | <b>Cat#</b> | <b>Dilution</b> |
|----------------------------|--------------|-----------------|-------------|-----------------|
| Anti-CD45 BUV395           | 30-F11       | BD Biosciences  | 565967      | 1:400           |
| Anti-CD3e BUV737           | 145-2C11     | BD Biosciences  | 612803      | 1:200           |
| Anti-CD4 BUV496            | GK1.5        | BD Biosciences  | 6564667     | 1:400           |
| Anti-CD8a BUV805           | 53-6.7       | BD Biosciences  | 564920      | 1:400           |
| Anti-NK1.1 BV510           | PK136        | BD Biosciences  | 563096      | 1:200           |
| Anti-NK1.1 APC-Cy7         | PK136        | BD Biosciences  | 560618      | 1:200           |
| Anti-TIGIT BV421           | 1G9          | BD Biosciences  | 565270      | 1:200           |
| Anti-CD11b BUV661          | M1/70        | BD Biosciences  | 565080      | 1:100           |
| Anti-CD11b BV711           | M1/70        | BD Biosciences  | 563168      | 1:100           |
| Anti-CD69 BV480            | H1.2F3       | BD Biosciences  | 746813      | 1:100           |
| Anti-NKG2A/C/E BV605       | 20d5         | BD Biosciences  | 564382      | 1:200           |
| Anti-CD226 PE              | TX42.1       | BD Biosciences  | 567357      | 1:100           |
| Anti-CD49b BV786           | HMA2         | BD Biosciences  | 740895      | 1:400           |
| Anti-Tim3 APC              | 5D12         | BD Biosciences  | 567164      | 1:200           |
| Anti-Tim3 BB515            | 5D12         | BD Biosciences  | 567810      | 1:400           |
| Anti-KLRG1 BV421           | 2F1          | BD Biosciences  | 562897      | 1:100           |
| Anti-KLRG1 BV605           | 2F1          | BD Biosciences  | 564013      | 1:200           |
| Anti-Tim3 FITC             | RMT3-23      | eBioscience     | 11-5870-82  | 1:400           |
| Anti-NKp46 Alexa Fluor 647 | 29A1.4       | Biolegend       | 137628      | 1:100           |
| Anti-NKp46 PE-Cy7          | 29A1.4       | eBioscience     | 25-3351-82  | 1:100           |
| Anti-CD107a PE             | 1D4B         | Biolegend       | 121612      | 1:50            |
| Anti-CD49a PE              | HMA1         | Biolegend       | 142604      | 1:100           |
| Anti-CD49a BV711           | HMA1         | BD Biosciences  | 564863      | 1:100           |
| Anti-CD120a/TNFR1 APC      | 55R-286      | Biolegend       | 113006      | 1:100           |
| Anti-CD120b/TNFR2 PE       | TR75-89      | Biolegend       | 113406      | 1:100           |
| Anti-CD3e Biotin           | 145-2C11     | Biolegend       | 100304      | 1:100           |
| Anti-CD19 Biotin           | MB19-1       | Biolegend       | 101504      | 1:100           |
| Anti-F4/80 Biotin          | BM8          | Biolegend       | 123106      | 1:100           |
| Anti-Ly6G Biotin           | 1A8          | Biolegend       | 127604      | 1:100           |
| Anti-IFN- $\gamma$ APC     | XMG1.2       | BD Biosciences  | 554413      | 1:50            |
| Anti-Ki-67 BV650           | B56          | BD Biosciences  | 567122      | 1:200           |
| Anti-FoxP3 PE-Cy5          | JFK-16S      | eBioscience     | 15-5773-82  | 1:400           |
| Anti-Eomes PE-cf610        | Dan11mag     | eBioscience     | 61-4875-82  | 1:200           |
